# Supplementary material for: Transition metal incorporation into seleno-bridged cubane type clusters of molybdenum and tungsten. X-Ray crystal structures of the first [Mo3CuSe4] derivatives†
Source: Royal Society of Chemistry journal article supplement (doi:10.1039/b104262a), 2001-01-01
Supplement: b104262a.doc [file b104262a.doc]

SUPPLEMENTARY MATERIAL (DALTON, B104262A)


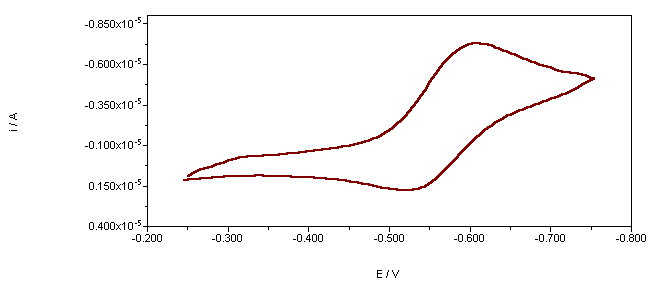


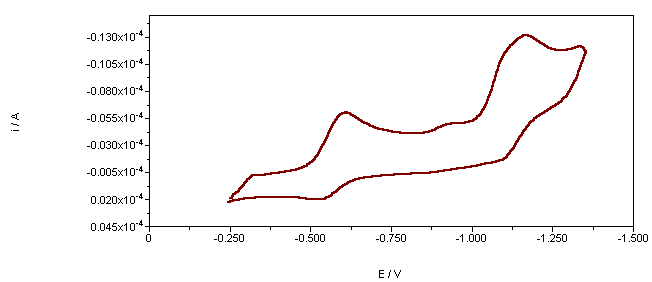


Cyclic voltammograms of [Mo3Se4Cl3(dmpe)3]PF6 **1** in CH3CN at a scan rate of 500 mV/s (reference Ag/AgCl). Ep(Fc+/Fc)=0.49 V, E=59 mV

**
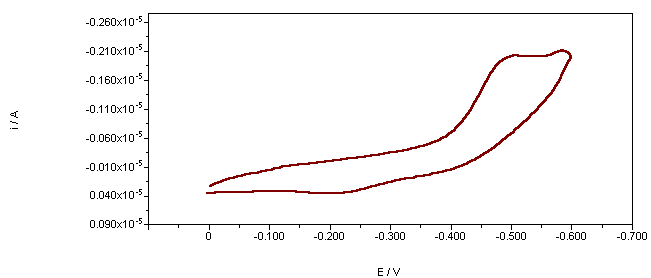

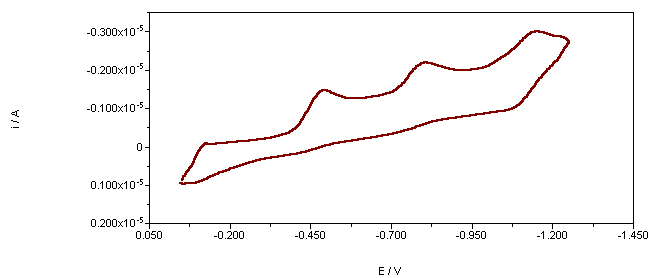
**

Cyclic voltammograms of [Mo3Se4Br3(dmpe)3]PF6 **2** in CH3CN at a scan rate of 100 mV/s (reference Ag/AgCl). Ep(Fc+/Fc)=0.50 V, E=50 mV

**
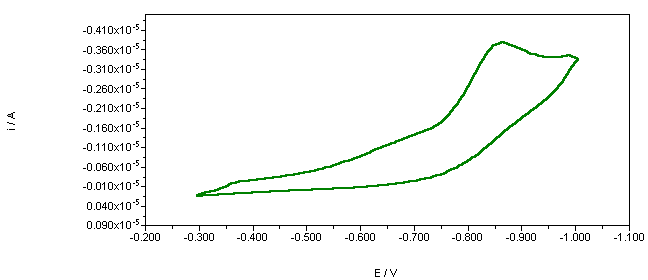
**


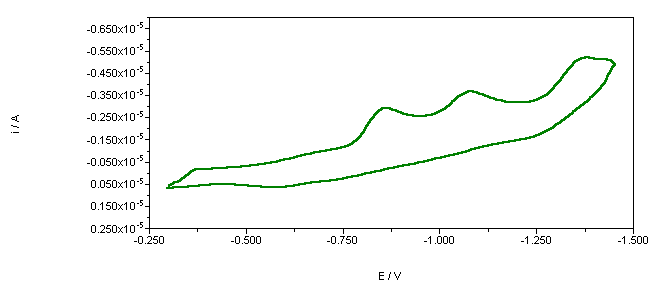


Cyclic voltammograms of [W3Se4Br3(dmpe)3]PF6 **3** in CH3CN at a scan rate of 100 mV/s (reference Ag/AgCl). Ep(Fc+/Fc)=0.49 V, E=55 mV


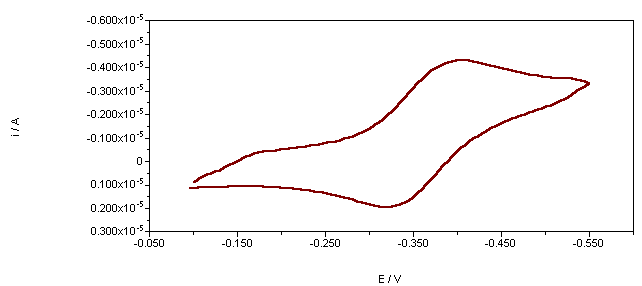


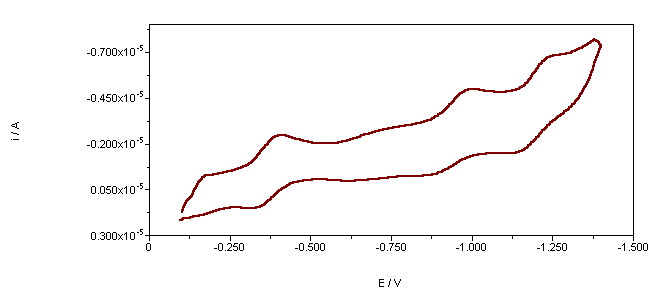

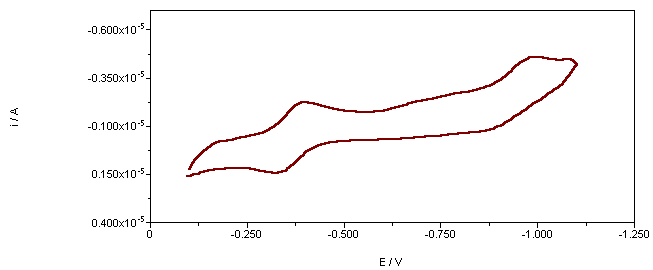


Cyclic voltammograms of [Mo3Se4CuCl4(dmpe)3]PF6 **4** in CH3CN at a scan rate of 500 mV/s (reference Ag/AgCl). Ep(Fc+/Fc)=0.43 V, E=62 mV


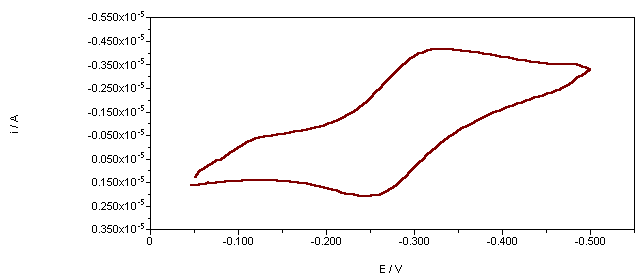

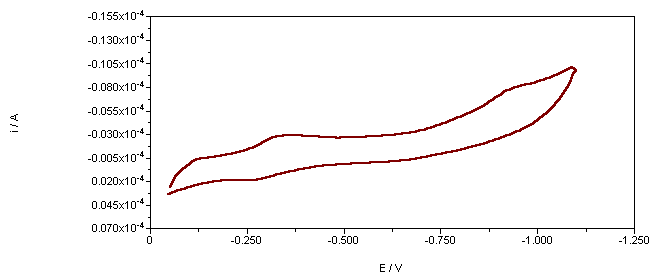

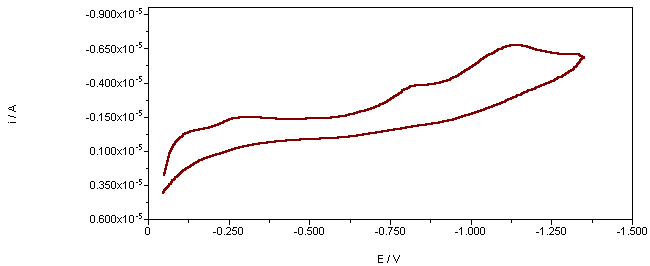


Cyclic voltammograms of [Mo3Se4CuBr4(dmpe)3]PF6 **5** in CH3CN at a scan rate of 100 mV/s (reference Ag/AgCl). Ep(Fc+/Fc)=0.45 V, E=58 mV
